# Supplementary material for: Lysosome Dynamic Properties during Neuronal Stem Cell Differentiation Studied by Spatiotemporal Fluctuation Spectroscopy and Organelle Tracking
Source: PubMed Central journal article supplement (PMC7247004; doi:10.3390/ijms21093397), 2020-05-11
Supplement: ijms-21-03397-s001.pdf [file ijms-21-03397-s001.pdf]

## Supplementary Tables

**Table 1S.** Average values of size,  $D_m$ ,  $\alpha$  and  $\alpha$  at short times ( $\alpha$  short) extracted from *i*MSD analysis of lysosomes during NSCs differentiation (DIV: day in vitro; SE: standard error).

| Size   |         |      |    | $D_m$  |         |       |       |
|--------|---------|------|----|--------|---------|-------|-------|
| DIV    | N total | Mean | SE | DIV    | N total | Mean  | SE    |
| 0      | 39      | 978  | 48 | 0      | 39      | 0.024 | 0.002 |
| 1, 2   | 48      | 759  | 36 | 1, 2   | 48      | 0.038 | 0.005 |
| 4, 5   | 80      | 774  | 34 | 4, 5   | 80      | 0.038 | 0.004 |
| 8, 9   | 44      | 688  | 30 | 8, 9   | 44      | 0.032 | 0.005 |
| 11, 12 | 74      | 581  | 15 | 11, 12 | 74      | 0.012 | 0.002 |
| 13     | 35      | 611  | 16 | 13     | 35      | 0.008 | 0.002 |
| 15, 16 | 27      | 527  | 18 | 15, 16 | 27      | 0.008 | 0.001 |
| 19     | 70      | 512  | 11 | 19     | 70      | 0.010 | 0.002 |
| 20, 21 | 22      | 538  | 23 | 20, 21 | 22      | 0.015 | 0.004 |
| 22     | 18      | 587  | 31 | 22     | 18      | 0.004 | 0.001 |

  

| $\alpha$ |         |      |      | $\alpha$ short |         |      |      |
|----------|---------|------|------|----------------|---------|------|------|
| DIV      | N total | Mean | SE   | DIV            | N total | Mean | SE   |
| 0        | 39      | 0.48 | 0.02 | 0              | 74      | 1.17 | 0.02 |
| 1, 2     | 48      | 0.52 | 0.03 | 1, 2           | 68      | 1.07 | 0.02 |
| 4, 5     | 80      | 0.59 | 0.03 | 4, 5, 6        | 111     | 1.03 | 0.02 |
| 8, 9     | 44      | 0.53 | 0.03 | 8, 9           | 70      | 0.93 | 0.02 |
| 11, 12   | 74      | 0.64 | 0.03 | 11, 12         | 97      | 1.04 | 0.02 |
| 13       | 35      | 0.66 | 0.04 | 13             | 33      | 1.06 | 0.06 |
| 15, 16   | 27      | 0.48 | 0.03 | 15, 16         | 52      | 0.96 | 0.03 |
| 19       | 70      | 0.50 | 0.03 | 19             | 93      | 1.00 | 0.02 |
| 20, 21   | 22      | 0.55 | 0.02 | 20, 21         | 29      | 1.14 | 0.03 |
| 22       | 18      | 0.46 | 0.03 | 22             | 21      | 1.05 | 0.06 |

**Table S2** (next page) Statistical data for Fig. 6. The total duration (time) of trajectories classified as undergoing a distinct type of motion (Conf: confined; Diff: diffusive; Drift: drifted) are reported for all observed DIV (days in vitro) in somas (soma) and projections (proj.), together with their uncertainties ( $\Delta$  time) and their percentages (%) with respect to the reported totals (TOT). We report also the starting number of trajectories (trajs) and the final number of trajectories and/or subtrajectories [(sub)trajs] after the two steps of trajectory segmentation; the comparison of these numbers can give an idea of the heterogeneity of motion amongst and within single lysosome trajectories.  $v_t$ : velocity threshold in the first step of trajectory segmentation (see main text).

|               |       | $v_i=1.0 \mu\text{m/s}$ |          |                   |        |                 |            | $v_i=0.5 \mu\text{m/s}$ |                   |        |                 |            |
|---------------|-------|-------------------------|----------|-------------------|--------|-----------------|------------|-------------------------|-------------------|--------|-----------------|------------|
| sample        | trajs | type                    | time (s) | $\Delta$ time (s) | time % | $\Delta$ time % | (sub)trajs | time (s)                | $\Delta$ time (s) | time % | $\Delta$ time % | (sub)trajs |
| DIV0          | 952   | Conf                    | 14609    | 795               | 86.8   | 4.7             | 966        | 15109                   | 771               | 90.0   | 4.6             | 1182       |
|               |       | Diff                    | 1392     | 167               | 8.3    | 1.0             | 198        | 316                     | 21                | 1.9    | 0.1             | 124        |
|               |       | Drift                   | 821      | 74                | 4.9    | 0.4             | 357        | 1359                    | 73                | 8.1    | 0.4             | 1258       |
|               |       | TOT                     | 16823    | 816               | 100.0  | 4.8             | 1521       | 16785                   | 775               | 100.0  | 4.6             | 2564       |
| DIV2          | 595   | Conf                    | 4600     | 407               | 67.9   | 6.0             | 477        | 5151                    | 342               | 76.7   | 5.1             | 900        |
|               |       | Diff                    | 1472     | 93                | 21.7   | 1.4             | 255        | 394                     | 25                | 5.9    | 0.4             | 176        |
|               |       | Drift                   | 704      | 45                | 10.4   | 0.7             | 493        | 1174                    | 30                | 17.5   | 0.5             | 1422       |
|               |       | TOT                     | 6776     | 420               | 100.0  | 6.2             | 1225       | 6719                    | 345               | 100.0  | 5.1             | 2498       |
| DIV4          | 967   | Conf                    | 4057     | 265               | 67.9   | 4.4             | 776        | 4500                    | 269               | 75.6   | 4.5             | 1011       |
|               |       | Diff                    | 947      | 62                | 15.8   | 1.0             | 243        | 284                     | 21                | 4.8    | 0.3             | 142        |
|               |       | Drift                   | 969      | 70                | 16.2   | 1.2             | 617        | 1169                    | 37                | 19.6   | 0.6             | 1212       |
|               |       | TOT                     | 5973     | 281               | 100.0  | 4.7             | 1636       | 5953                    | 272               | 100.0  | 4.6             | 2365       |
| DIV5          | 607   | Conf                    | 2998     | 317               | 41.6   | 4.4             | 539        | 4216                    | 279               | 58.7   | 3.9             | 1081       |
|               |       | Diff                    | 3236     | 159               | 44.9   | 2.2             | 570        | 999                     | 39                | 13.9   | 0.5             | 452        |
|               |       | Drift                   | 967      | 38                | 13.4   | 0.5             | 988        | 1968                    | 33                | 27.4   | 0.5             | 2576       |
|               |       | TOT                     | 7202     | 356               | 100.0  | 4.9             | 2097       | 7183                    | 283               | 100.0  | 3.9             | 4109       |
| DIV9          | 766   | Conf                    | 10797    | 775               | 78.9   | 5.7             | 762        | 11452                   | 740               | 83.9   | 5.4             | 1097       |
|               |       | Diff                    | 2118     | 114               | 15.5   | 0.8             | 339        | 672                     | 47                | 4.9    | 0.3             | 233        |
|               |       | Drift                   | 775      | 80                | 5.7    | 0.6             | 516        | 1519                    | 82                | 11.1   | 0.6             | 1642       |
|               |       | TOT                     | 13690    | 787               | 100.0  | 5.8             | 1617       | 13644                   | 746               | 100.0  | 5.5             | 2972       |
| DIV12 (soma)  | 680   | Conf                    | 10629    | 723               | 81.5   | 5.5             | 892        | 11321                   | 708               | 87.1   | 5.4             | 1048       |
|               |       | Diff                    | 1940     | 129               | 14.9   | 1.0             | 274        | 534                     | 35                | 4.1    | 0.3             | 176        |
|               |       | Drift                   | 478      | 66                | 3.7    | 0.5             | 302        | 1146                    | 55                | 8.8    | 0.4             | 1264       |
|               |       | TOT                     | 13047    | 738               | 100.0  | 5.7             | 1468       | 13001                   | 711               | 100.0  | 5.5             | 2488       |
| DIV15 (soma)  | 699   | Conf                    | 11647    | 762               | 91.3   | 6.0             | 670        | 11822                   | 761               | 92.7   | 6.0             | 826        |
|               |       | Diff                    | 661      | 63                | 5.2    | 0.5             | 114        | 248                     | 25                | 1.9    | 0.2             | 80         |
|               |       | Drift                   | 454      | 36                | 3.6    | 0.3             | 214        | 686                     | 33                | 5.4    | 0.3             | 683        |
|               |       | TOT                     | 12762    | 765               | 100.0  | 6.0             | 998        | 12756                   | 762               | 100.0  | 6.0             | 1589       |
| DIV19 (soma)  | 816   | Conf                    | 18970    | 1089              | 90.4   | 5.2             | 967        | 19389                   | 1051              | 92.5   | 5.0             | 1165       |
|               |       | Diff                    | 1140     | 89                | 5.4    | 0.4             | 163        | 318                     | 29                | 1.5    | 0.1             | 108        |
|               |       | Drift                   | 884      | 94                | 4.2    | 0.4             | 427        | 1258                    | 65                | 6.0    | 0.3             | 1234       |
|               |       | TOT                     | 20994    | 1097              | 100.0  | 5.2             | 1557       | 20965                   | 1053              | 100.0  | 5.0             | 2507       |
| DIV22 (soma)  | 635   | Conf                    | 12724    | 891               | 93.0   | 6.5             | 700        | 12715                   | 890               | 93.1   | 6.5             | 721        |
|               |       | Diff                    | 329      | 28                | 2.4    | 0.2             | 91         | 109                     | 13                | 0.8    | 0.1             | 55         |
|               |       | Drift                   | 628      | 79                | 4.6    | 0.6             | 241        | 827                     | 80                | 6.1    | 0.6             | 536        |
|               |       | TOT                     | 13681    | 895               | 100.0  | 6.5             | 1032       | 13651                   | 893               | 100.0  | 6.5             | 1312       |
| DIV12 (proj.) | 183   | Conf                    | 3903     | 435               | 76.3   | 8.5             | 372        | 4208                    | 439               | 82.6   | 8.6             | 359        |
|               |       | Diff                    | 582      | 108               | 11.4   | 2.1             | 68         | 141                     | 15                | 2.8    | 0.3             | 57         |
|               |       | Drift                   | 633      | 154               | 12.4   | 3.0             | 204        | 746                     | 136               | 14.6   | 2.7             | 527        |
|               |       | TOT                     | 5118     | 474               | 100.0  | 9.3             | 644        | 5094                    | 460               | 100.0  | 9.0             | 943        |
| DIV15 (proj.) | 481   | Conf                    | 6229     | 559               | 67.1   | 6.0             | 555        | 7060                    | 493               | 76.4   | 5.3             | 1015       |
|               |       | Diff                    | 2149     | 154               | 23.2   | 1.7             | 271        | 659                     | 54                | 7.1    | 0.6             | 189        |
|               |       | Drift                   | 906      | 63                | 9.8    | 0.7             | 584        | 1527                    | 57                | 16.5   | 0.6             | 1566       |
|               |       | TOT                     | 9284     | 583               | 100.0  | 6.3             | 1410       | 9246                    | 499               | 100.0  | 5.4             | 2770       |
| DIV19 (proj.) | 551   | Conf                    | 11474    | 830               | 81.6   | 5.9             | 771        | 11973                   | 781               | 85.5   | 5.6             | 1181       |
|               |       | Diff                    | 1758     | 101               | 12.5   | 0.7             | 277        | 337                     | 27                | 2.4    | 0.2             | 134        |
|               |       | Drift                   | 837      | 44                | 5.9    | 0.3             | 669        | 1691                    | 81                | 12.1   | 0.6             | 1786       |
|               |       | TOT                     | 14069    | 837               | 100.0  | 5.9             | 1717       | 14001                   | 786               | 100.0  | 5.6             | 3101       |
| DIV22 (proj.) | 205   | Conf                    | 3977     | 491               | 86.4   | 10.7            | 261        | 4117                    | 482               | 89.5   | 10.5            | 271        |
|               |       | Diff                    | 208      | 34                | 4.5    | 0.7             | 47         | 84                      | 28                | 1.8    | 0.6             | 27         |
|               |       | Drift                   | 419      | 68                | 9.1    | 1.5             | 142        | 397                     | 46                | 8.6    | 1.0             | 315        |
|               |       | TOT                     | 4604     | 497               | 100.0  | 10.8            | 450        | 4598                    | 485               | 100.0  | 10.6            | 613        |

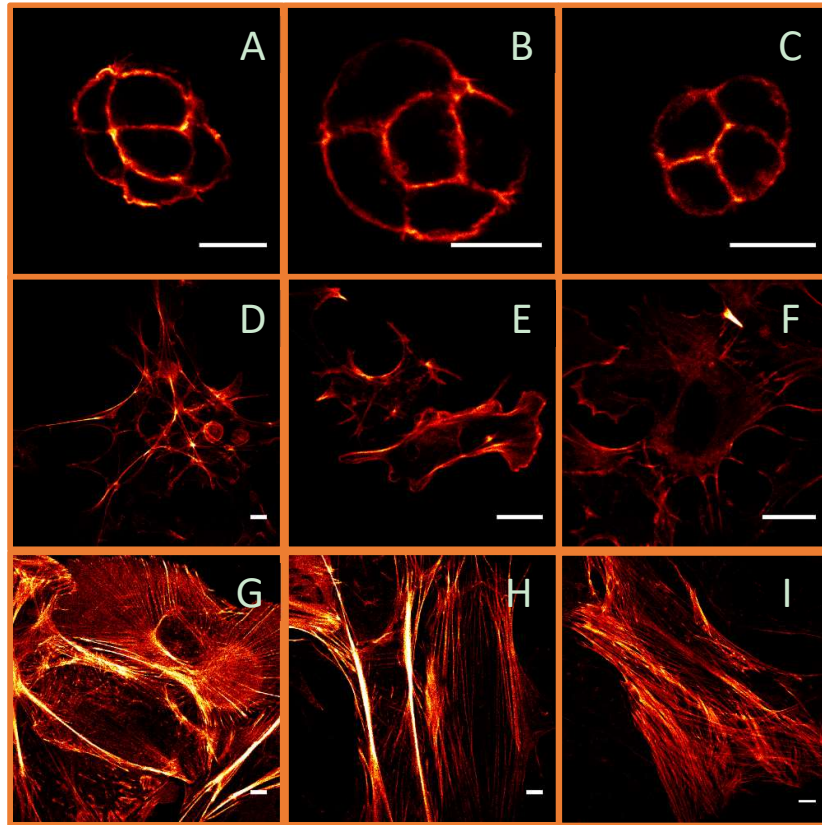

**Figure S1.** Confocal images showing F-actin stained with Alexa Fluor™ 647 Phalloidin. (A, B, C) DIV0 mouse embryonic stem cells (mESCs), at the beginning of cortical differentiation in medium without 2i and LIF. (D, E, F) Representative image of DIV5 mouse progenitor cortical neurons obtained by Wnt and BMP signalling pathways blockade in N2B27 medium. (G, H, I) Representative images of DIV14 mouse cortical projection neurons maintained in neurobasal B27 medium. Scale bars in all images, 10  $\mu$ m.
